# Supplementary material
Source: Springer Nature journal article supplement (https://www.springermedizin.de/resource/supplementary/12936_2007_349_MOESM6_ESM.pdf/9547610)

**A**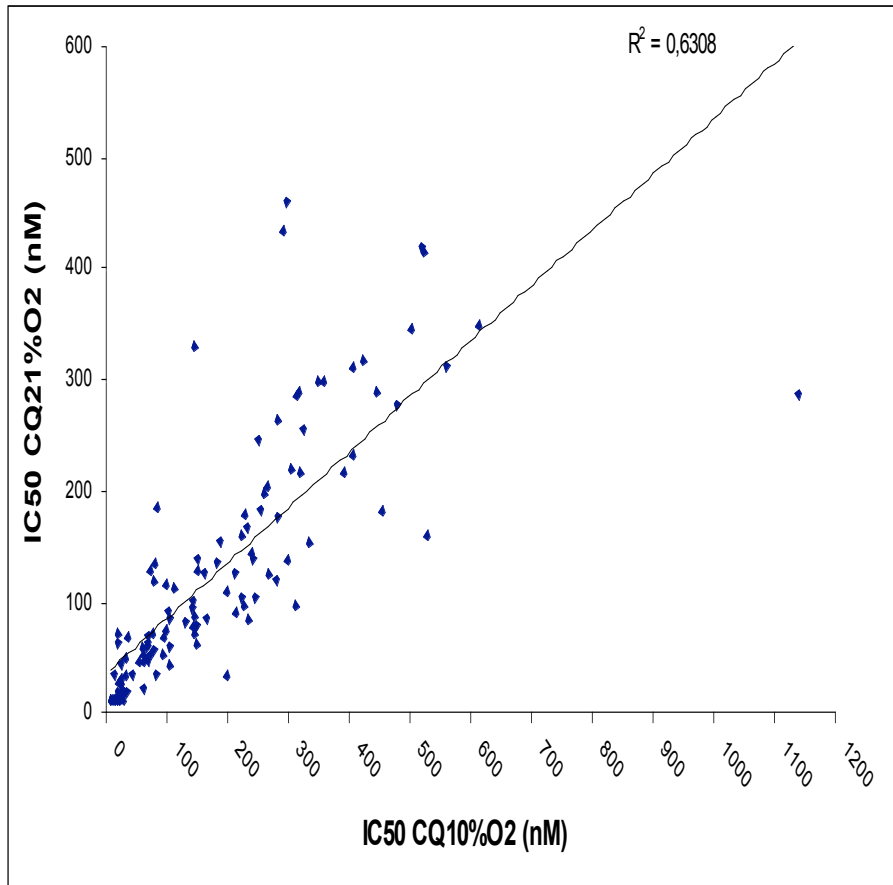**B**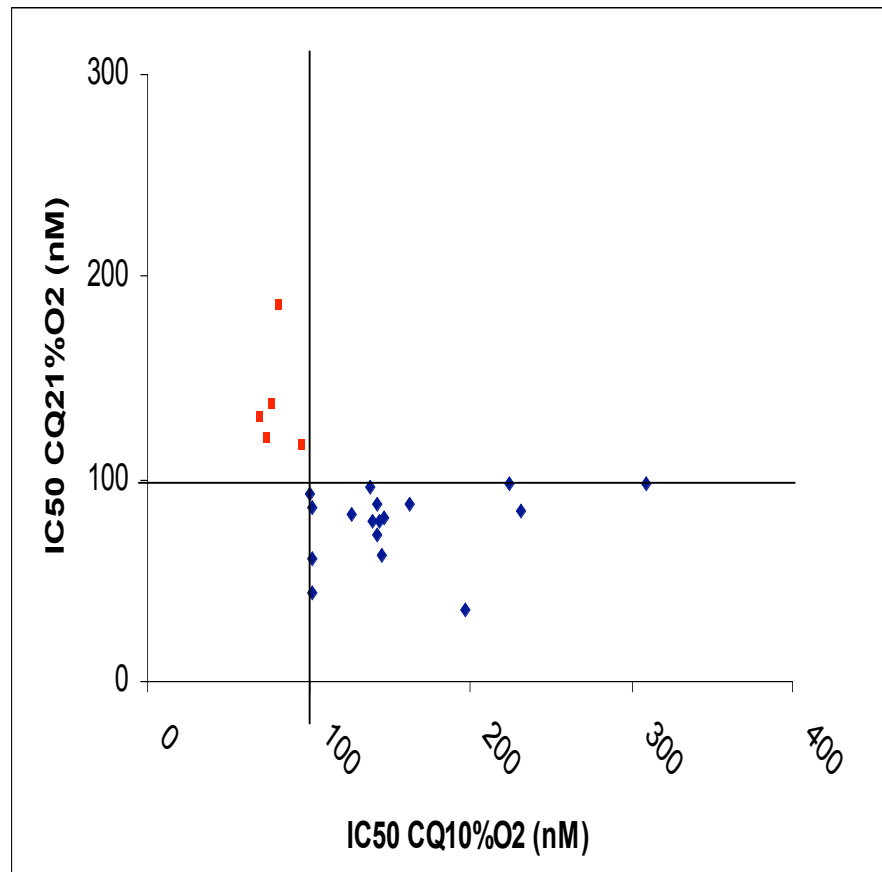

Supplement: MOESM6 [file 9547610]
